# Supplementary material for: Periodic auto-active gels with topologically “polyrotaxane-interlocked” structures
Source: Royal Society of Chemistry journal article supplement (doi:10.1039/c4cc01169d), 2014-01-01
Supplement: c4cc01169d1.pdf [file c4cc01169d1.pdf]

# Supporting Information

## Periodic Auto-active Gel with Topologically “Polyrotaxane-interlocked” Structure

Hongwei Zhou,<sup>ab</sup> Yaru Wang,<sup>ab</sup> Zhaohui Zheng,<sup>a</sup> Xiaobin Ding,<sup>\*a</sup> and Yuxing Peng<sup>a</sup>

<sup>a</sup>Chengdu Institute of Organic Chemistry, CAS, Chengdu 610041, P. R. China. E-mail: [xbding@cioc.ac.cn](mailto:xbding@cioc.ac.cn)

<sup>b</sup>University of the Chinese Academy of Sciences (CAS), Beijing 100049, P. R. China

### 1. Materials

4'-(4-hydroxyphenyl)-2,2':6',2''-terpyridine (*TpyPhOH*) and 4'-(4-methylphenyl)-2,2':6',2''-terpyridine-ruthenium(III) chloride (*[Ru(TpyPhMe)]Cl<sub>3</sub>*) were synthesized and purified according to the previous method.<sup>1</sup> *N*-Isopropylacrylamide (*NIPAAm*) (Aldrich, A.R.) was purified by recrystallization from its toluene solution and dried under vacuum. 2,2'-Azobisisobutyronitrile (*AIBN*) (Aldrich, A.R.) was recrystallized from methanol prior to use. *N*-(3-Bromopropyl) phthalimide, acryloyl chloride, *N*, *N'*-methylene bis(2-acrylamide) (*BIS*) and 3,5-dimethylphenol were purchased from *J&K* chemicals. PEG (*M<sub>n</sub>*=2000 g/mol) was extracted from water, dried overnight with anhydrous Na<sub>2</sub>SO<sub>4</sub>, concentrated and precipitated three times from diethyl ether. All the other reagents were purchased from Sinopharm Chemical Reagent Co., Ltd. and used as received unless otherwise specified.

### 2. Synthesis of TpyNA (C4)

TpyNA (C4) was synthesized according to the route in Fig. S1. C3 was synthesized according the previous method.<sup>2</sup> The synthesis of C4 is as follows. A solution of acryloyl chloride (1.5 ml, 0.019 mol) in 20 ml dry CH<sub>2</sub>Cl<sub>2</sub> was added dropwise into a solution of C3 (4.5 g, 0.012 mol) and NEt<sub>3</sub> (1.6 ml, 0.012 mol) in 100 ml CH<sub>2</sub>Cl<sub>2</sub> in a ice-water bath. The resulting mixture was stirred at room temperature for 12 h. After reaction, the mixture was thoroughly washed with NaHCO<sub>3</sub> (5 wt%),

HCl (1 mol/l) and saturated NaCl. The organic phase was dried with anhydrous  $\text{Na}_2\text{SO}_4$  over night and concentrated in vacuo. The pure product C4 was obtained by recrystallization from its ethanol solution. The  $^1\text{H}$ NMR spectra is given in Fig. S2 and Fig. S3.

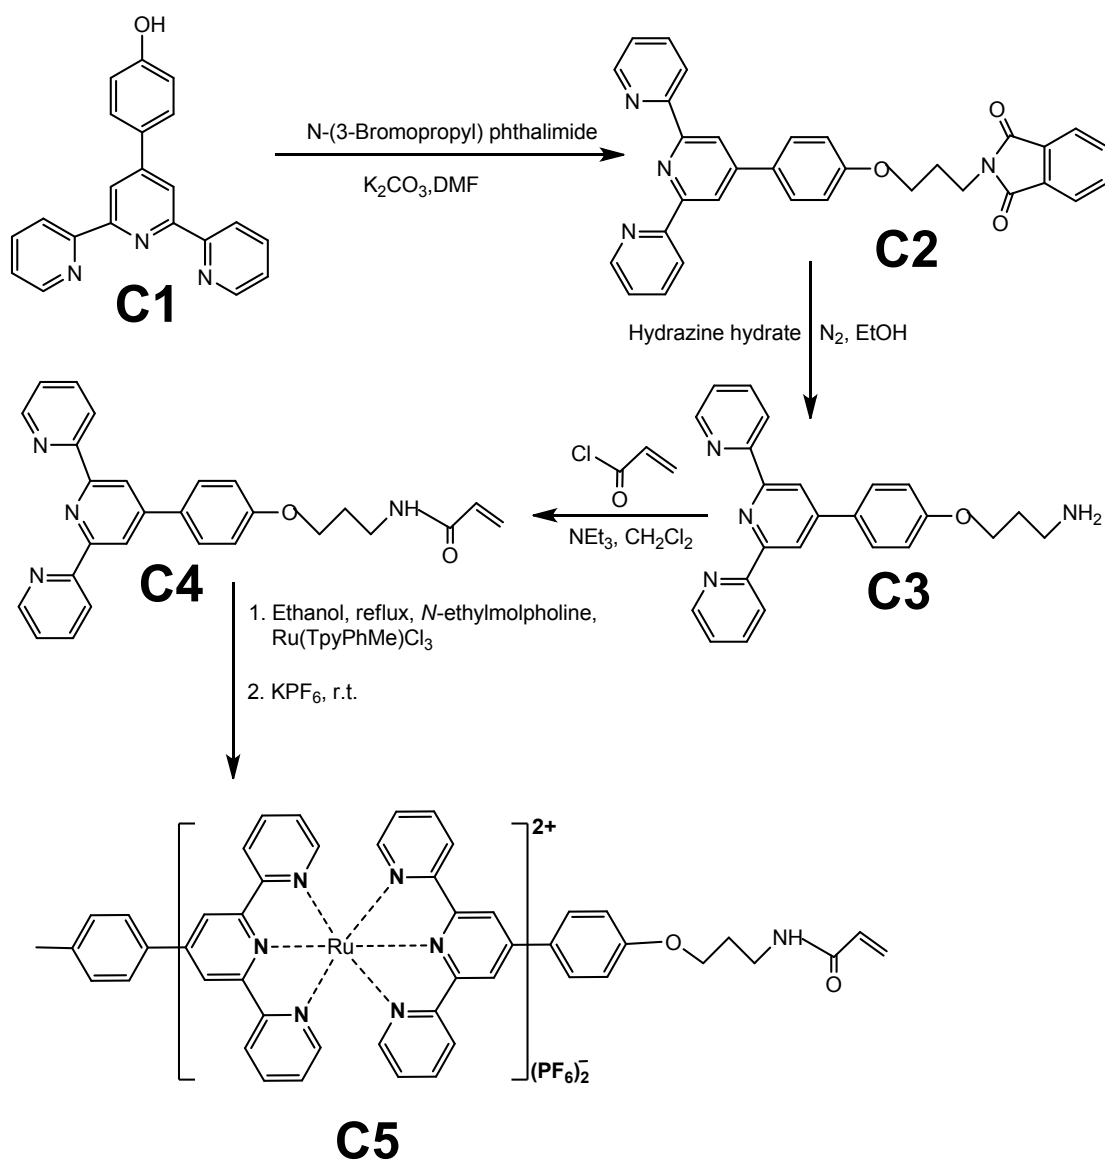

Fig. S1 The synthesis route for the ruthenium-terpyridine monomer (C5).

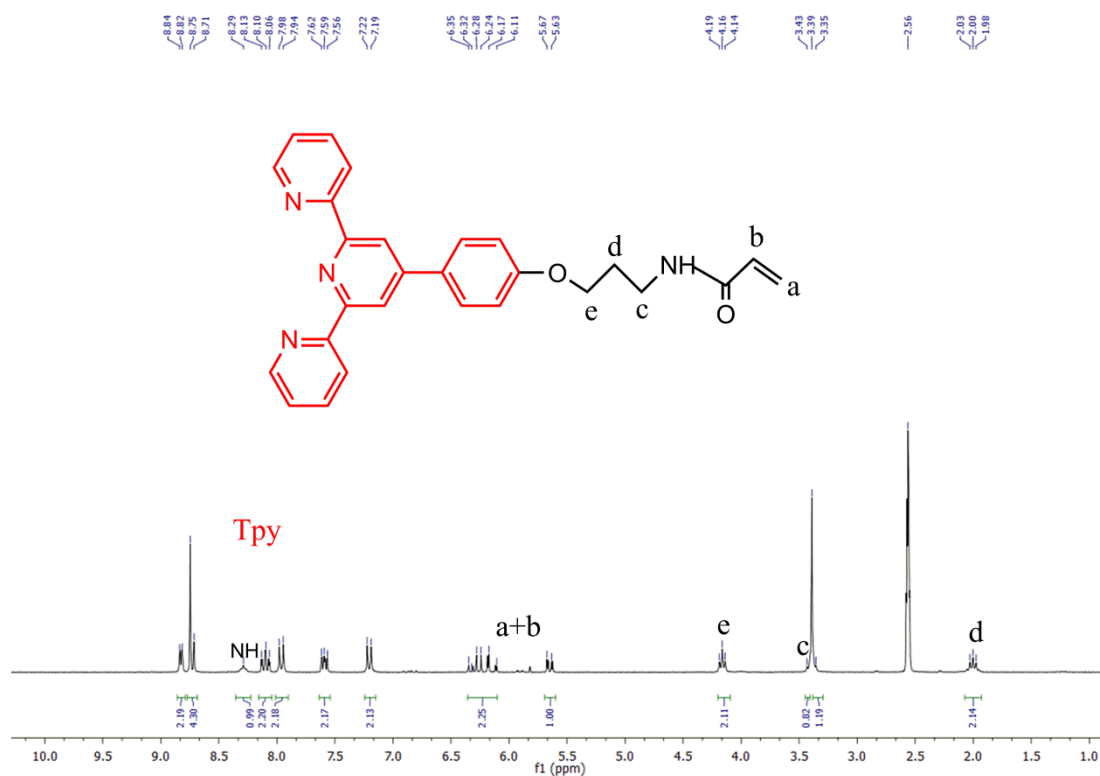

Fig. S2 <sup>1</sup>H NMR spectra of C4 in DMSO-d<sub>6</sub>.

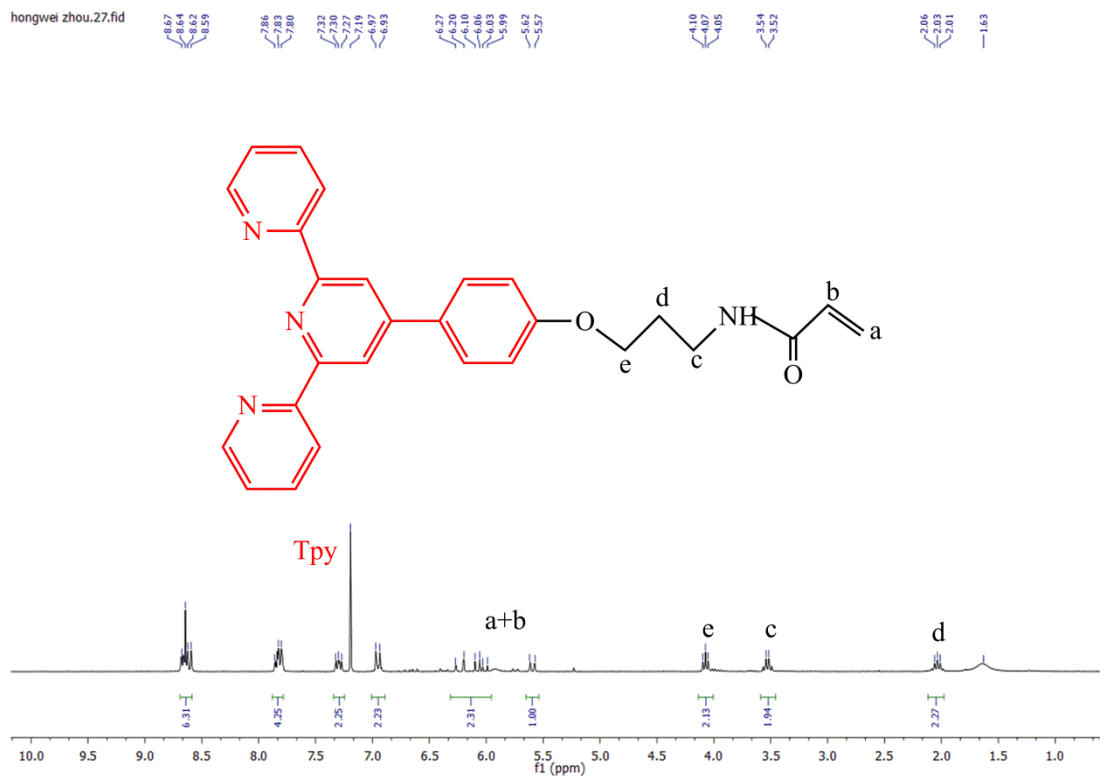

Fig. S3 <sup>1</sup>H NMR spectra of C4 in CDCl<sub>3</sub>.

### 3. Synthesis of [Ru(II)(TpyNA)(TpyPhMe)](PF<sub>6</sub>)<sub>2</sub> (C5)

[Ru(II)(TpyNA)(TpyPhMe)](PF<sub>6</sub>)<sub>2</sub> was synthesized according to the route designed in **Fig. S1** by two steps. The detailed synthesis is as follows: [Ru(TpyPhMe)]Cl<sub>3</sub> (0.4119 g, 0.77 mmol) was dissolved in 30 ml ethanol and then TpyPhA (0.3387 g, 0.77 mmol) and two drops of *N*-ethyl morpholine was added into the above solution. The resulting mixture was refluxed for 6 h. Afterwards, KPF<sub>6</sub> was added to replace the counter ions. The obtained precipitation was filtered and recrystallized to get **C5** as dark red solid. The <sup>1</sup>HNMR spectra is given in **Fig. S4** and the UV-VIS spectra is given in **Fig. S5**.

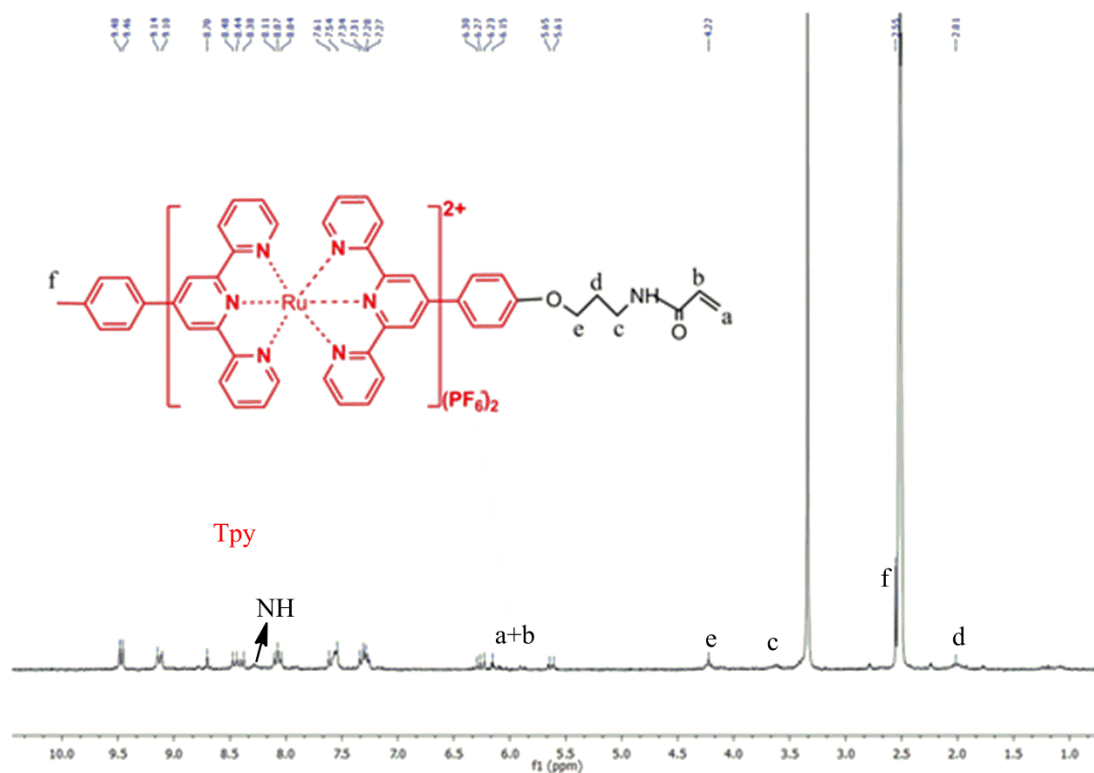

Fig. S4 <sup>1</sup>H NMR spectra of C5 in DMSO-d<sub>6</sub>.

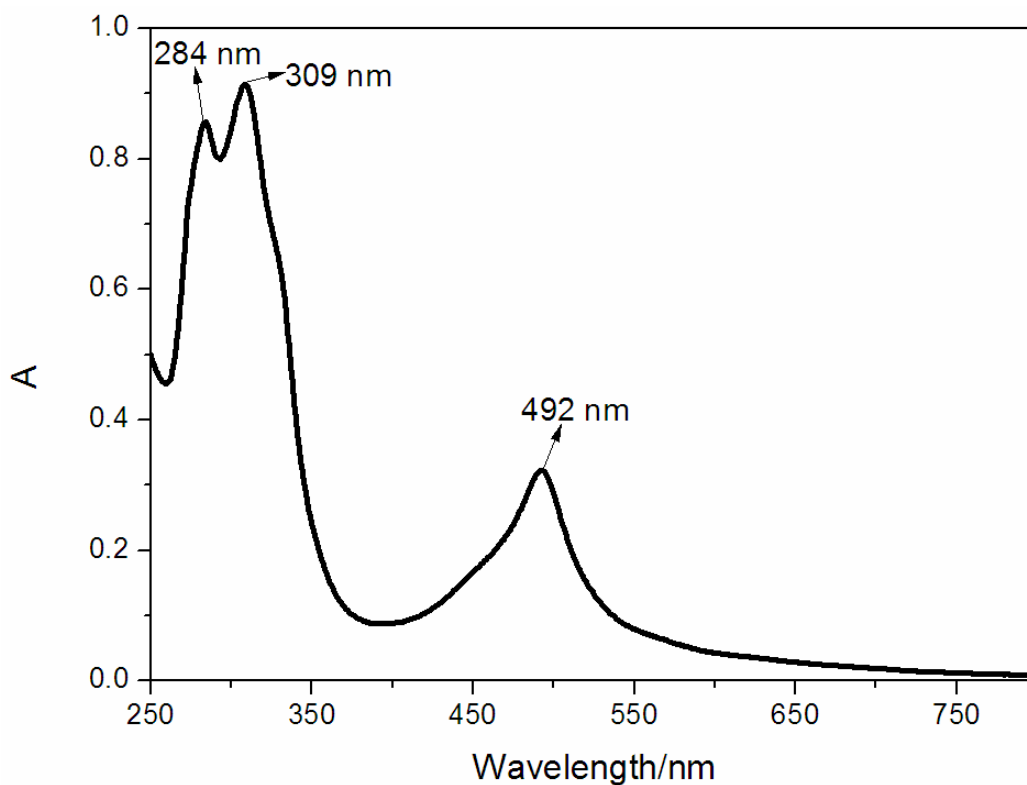

Fig. S5 UV-VIS spectra of C5 in MeCN.

#### 4. Synthesis of PEG/ $\alpha$ -CD polyrotaxane crosslinking agent

PEG/ $\alpha$ -CD polyrotaxane crosslinking agent (MPR) was synthesized according to the route in Fig. S6 by an assembly process, a capping process and a modification process according to the previous literatures<sup>3</sup>. The <sup>1</sup>HNMR spectra of the key materials are given in Fig. S7. From the <sup>1</sup>HNMR spectra, the number of  $\alpha$ -CD trapped on a individual PEG chain is estimated to be 7 and the coverage ratio is about 32%. The average degree of double bond substitution per  $\alpha$ -CD unit is found to be 1.

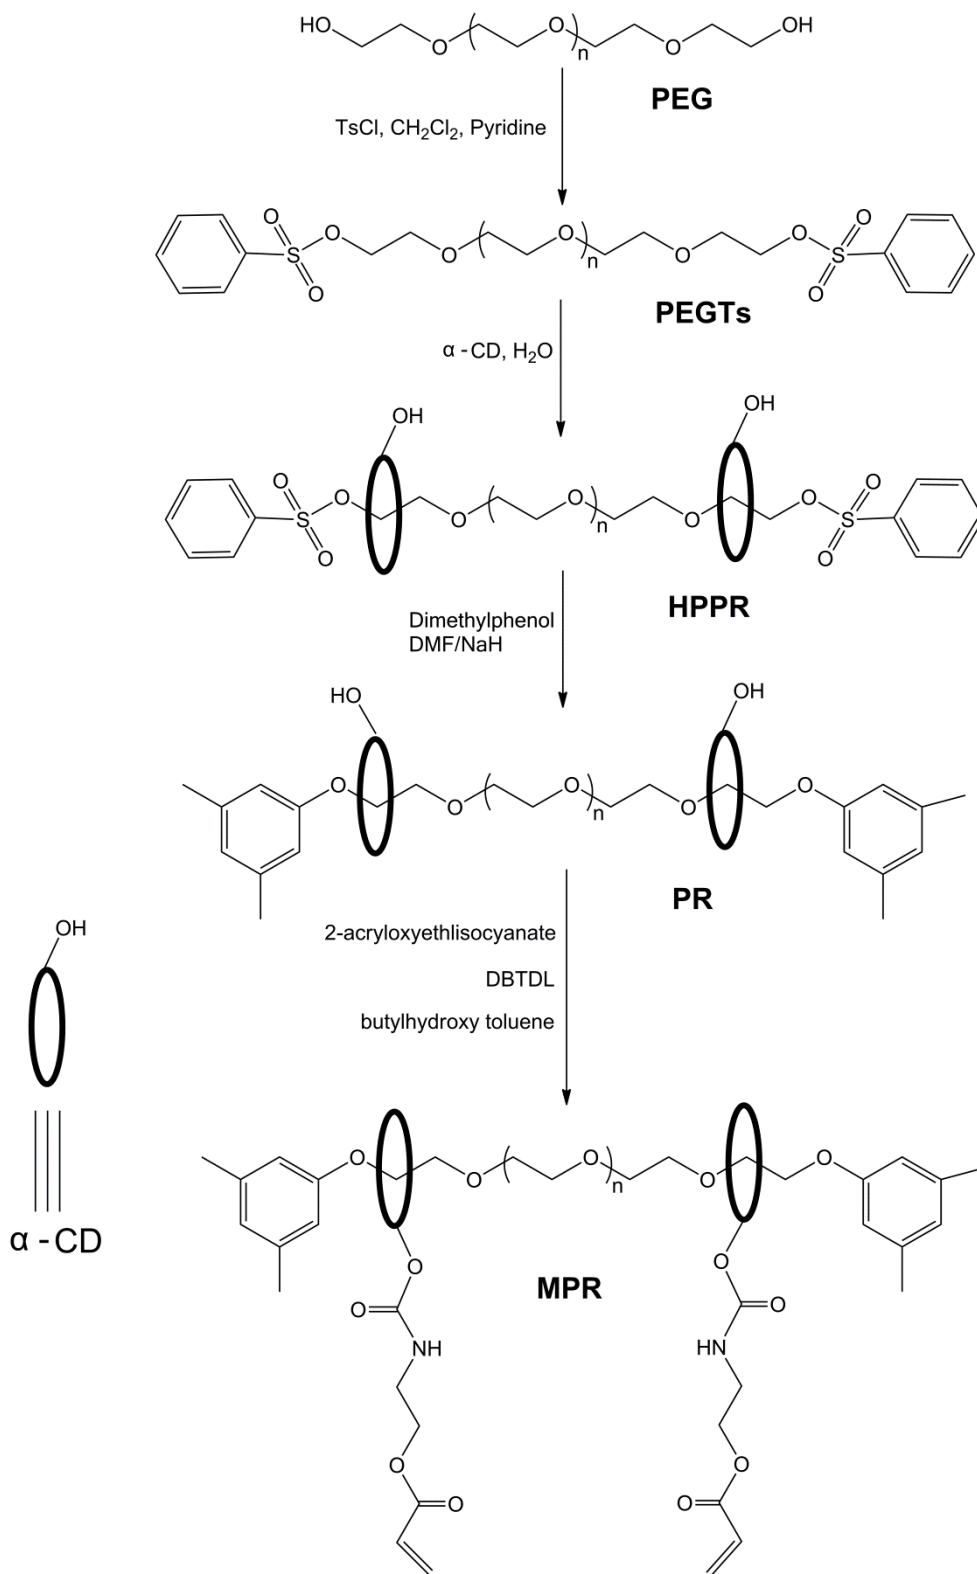

Fig. S6 Synthesis route for the PEG/α-CD polyrotaxane crosslinking agent.

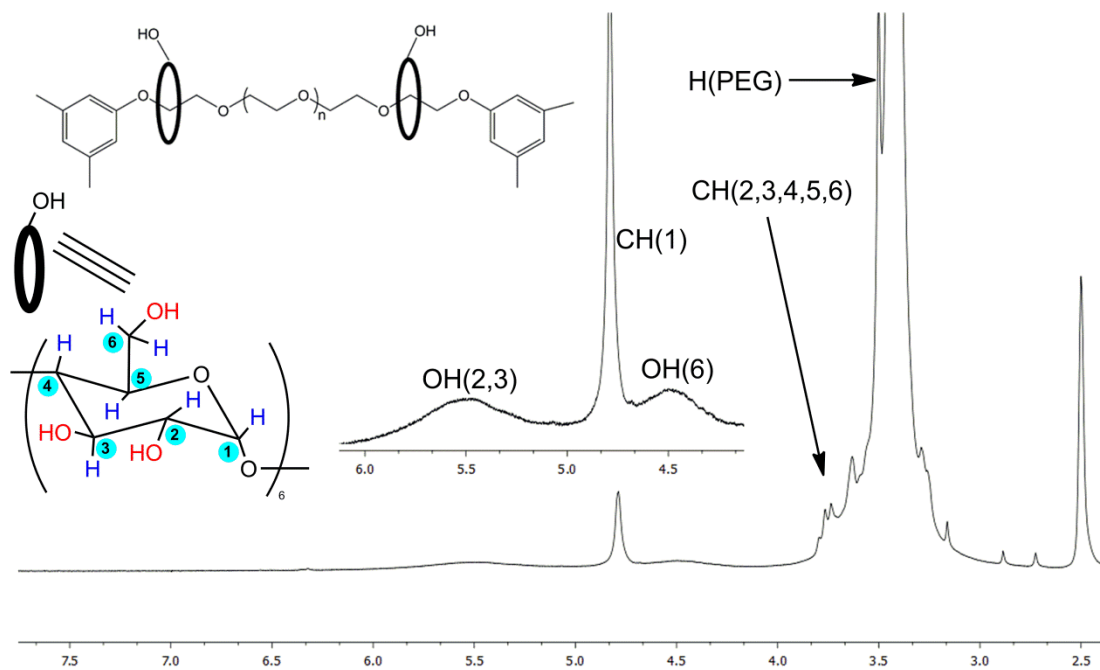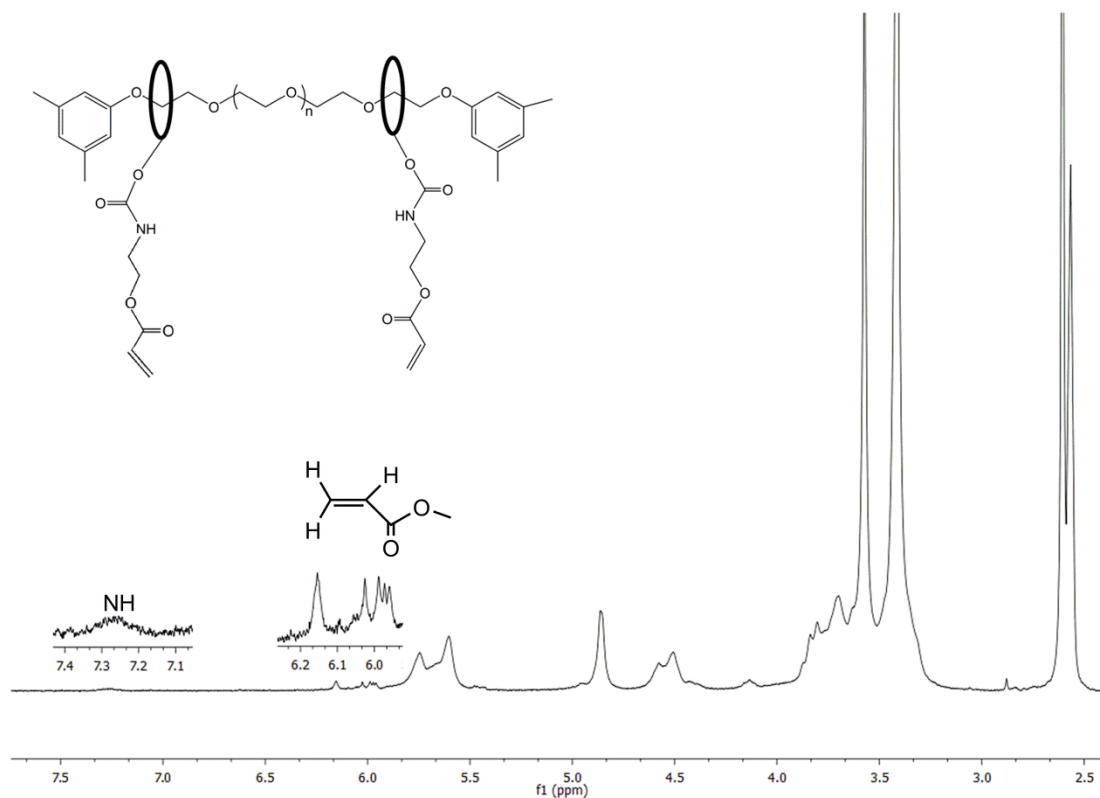

Fig. S7  $^1\text{H}$ NMR spectra of PR (upper) and MPR (lower) in DMSO- $d_6$ .

## 5. Preparation of the active gels.

The active gels were prepared by a free radical polymerization of NIPAAm and [Ru(II)(TpyNA)(TpyPhMe)](PF<sub>6</sub>)<sub>2</sub> in the presence of crosslinker. Take G1 as an example, a 1.0 ml solution of dry DMSO containing NIPAAm (0.5 g, 0.0044 mol), C5 (0.025 g, 2.17 x 10<sup>-5</sup> mol), BIS (0.0068 g, 4.39 x 10<sup>-5</sup> mol), AIBN (0.0089 g, 5.42 x 10<sup>-5</sup> mol) was bubbled with neat N<sub>2</sub> for 30 min under ice-water bath. Afterwards, the pregel solution was injected into a mould of two Teflon slides separated by a 2 mm thickness silicone rubber sheet. After gelation at 60 °C for 24 h, the gel was thoroughly washed with DMSO and graded DMSO/H<sub>2</sub>O to remove the unreacted monomers and residues. Other gels are prepared in a similar method (**Table S1**).

**Table S1** Sample codes of BIS-crosslinked gels and topological gels.

| Gels | NIPAAm<br>(mol/l) | C5<br>(mol/l) | AIBN<br>(mol/l) | BIS<br>(mol%) | <sup>a</sup> MPR<br>(mol%) | Solvent |
|------|-------------------|---------------|-----------------|---------------|----------------------------|---------|
| G1   | 4.4               | 0.022         | 0.054           | 1             |                            | DMSO    |
| G2   | 4.4               | 0.022         | 0.054           | 3             | None                       | DMSO    |
| G3   | 4.4               | 0.022         | 0.054           | 6             |                            | DMSO    |
| TG1  | 4.4               | 0.022         | 0.054           |               | 2( $\alpha$ -CD)           | DMSO    |
| TG2  | 4.4               | 0.022         | 0.054           | None          | 6( $\alpha$ -CD)           | DMSO    |
| TG3  | 4.4               | 0.022         | 0.054           |               | 12( $\alpha$ -CD)          | DMSO    |

<sup>a</sup>For the preparation of topological gels, the MPR was first completely dissolved in dry DMSO with the assistance of ultrasound before adding the monomers and AIBN.



## 6. Setup and online study of the AGs

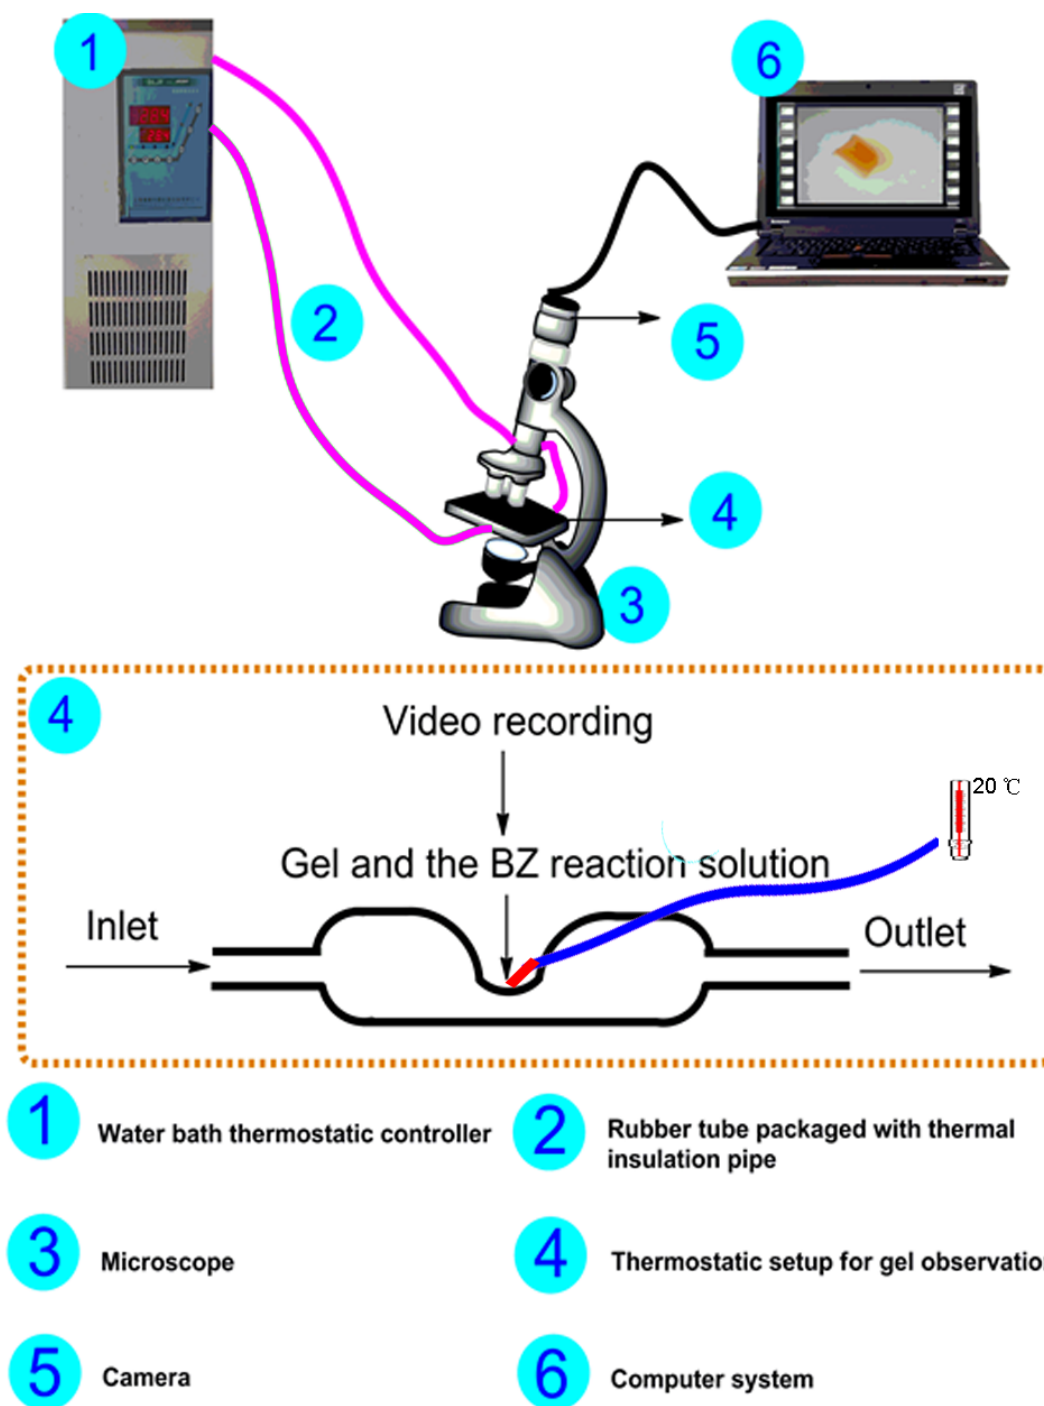

Fig. S8 The setup for online study of the AGs.

Most of the images were taken on the setup shown in Fig. S8. The temperature inside the small pool was controlled by a flowing water bath driven by a thermostatic

circulator. The optical images and videos of the AGs were recorded at different designed conditions. Analyzing the images gives the time and temperature-dependent responsive behaviors. To keep the AGs in the reduced and the oxidized state, the gel samples were first equilibrated in a solutions of 5 mM  $\text{Ce}(\text{SO}_4)_2$  and 900 mM  $\text{HNO}_3$  or 5 mM  $\text{Ce}_2(\text{SO}_4)_3$  and 900 mM  $\text{HNO}_3$ .<sup>4</sup> The mechanical oscillation and the chemical wave propagation were also observed on the steep shown in Fig. S8. The concentration of BZ substrates were fixed at:  $[\text{NaBrO}_3]=0.08 \text{ mol l}^{-1}$ ,  $[\text{Malonic acid}]=0.06 \text{ mol l}^{-1}$ ,  $[\text{HNO}_3] = 0.9 \text{ mol l}^{-1}$ .

## 7. Other supporting materials

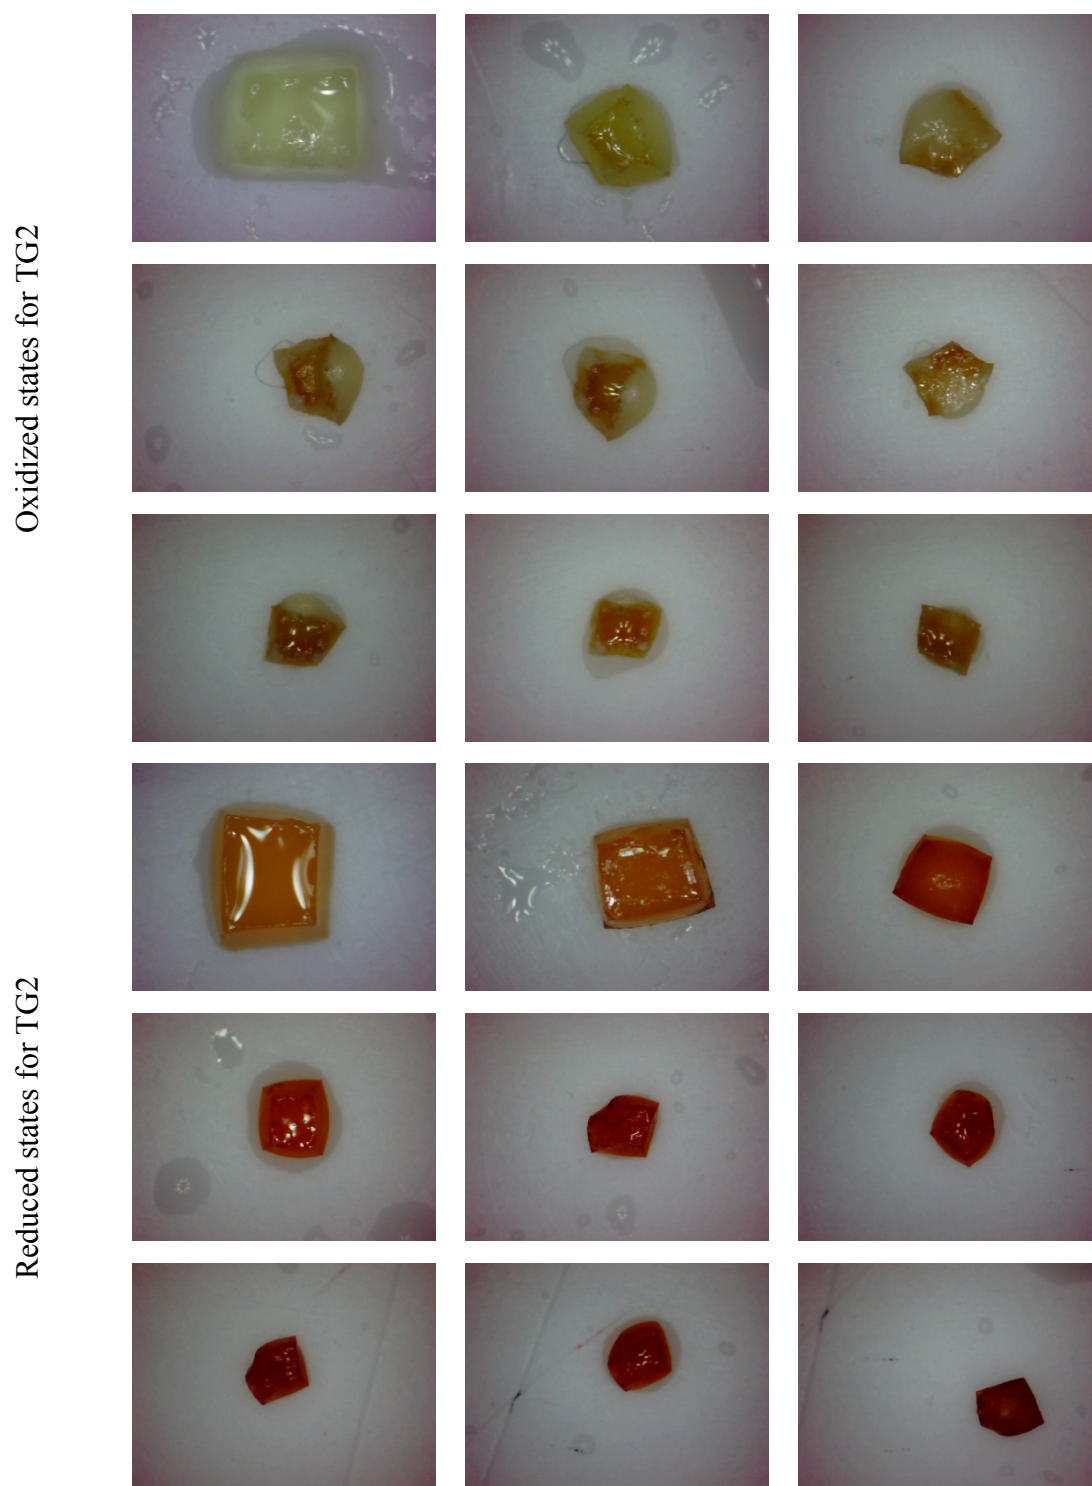

Fig. S9 Representative optical images of the oxidized and reduced states of TG2 at different temperatures from 15 °C (the first image) to 50 °C (the last image). These images are related to Fig. 3.

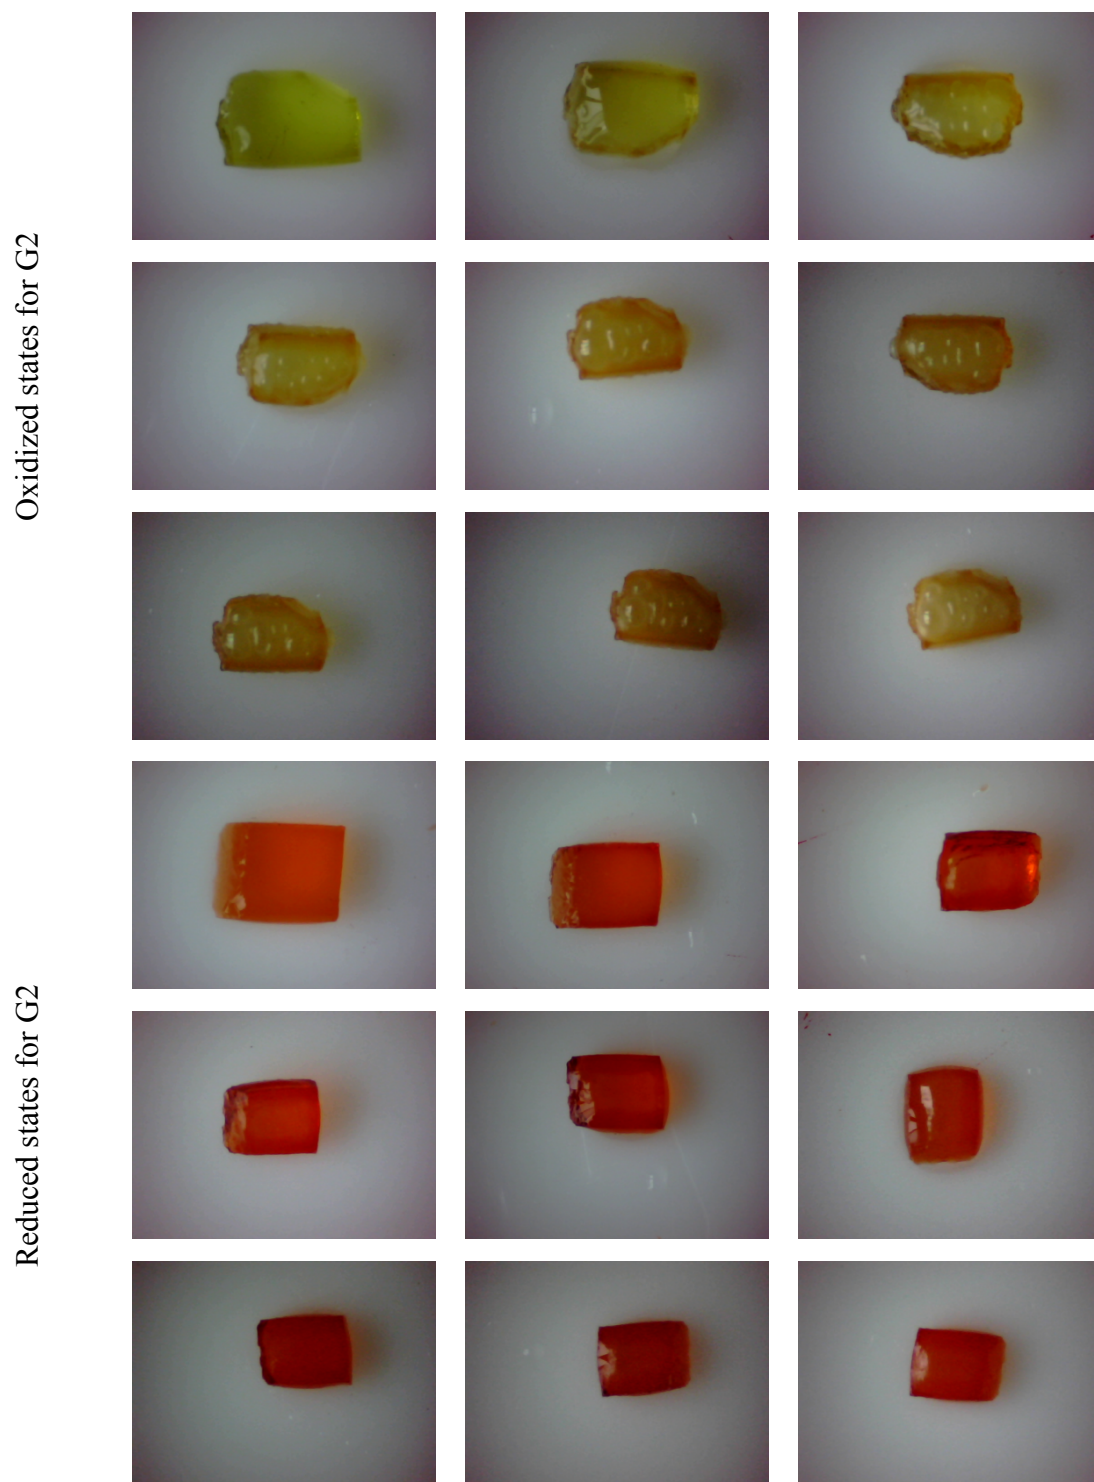

Fig. S10 Representative optical images of the oxidized and reduced G2 at different temperatures from 15 °C (the first image) to 50 °C (the last image). These images are related to Fig. 3..

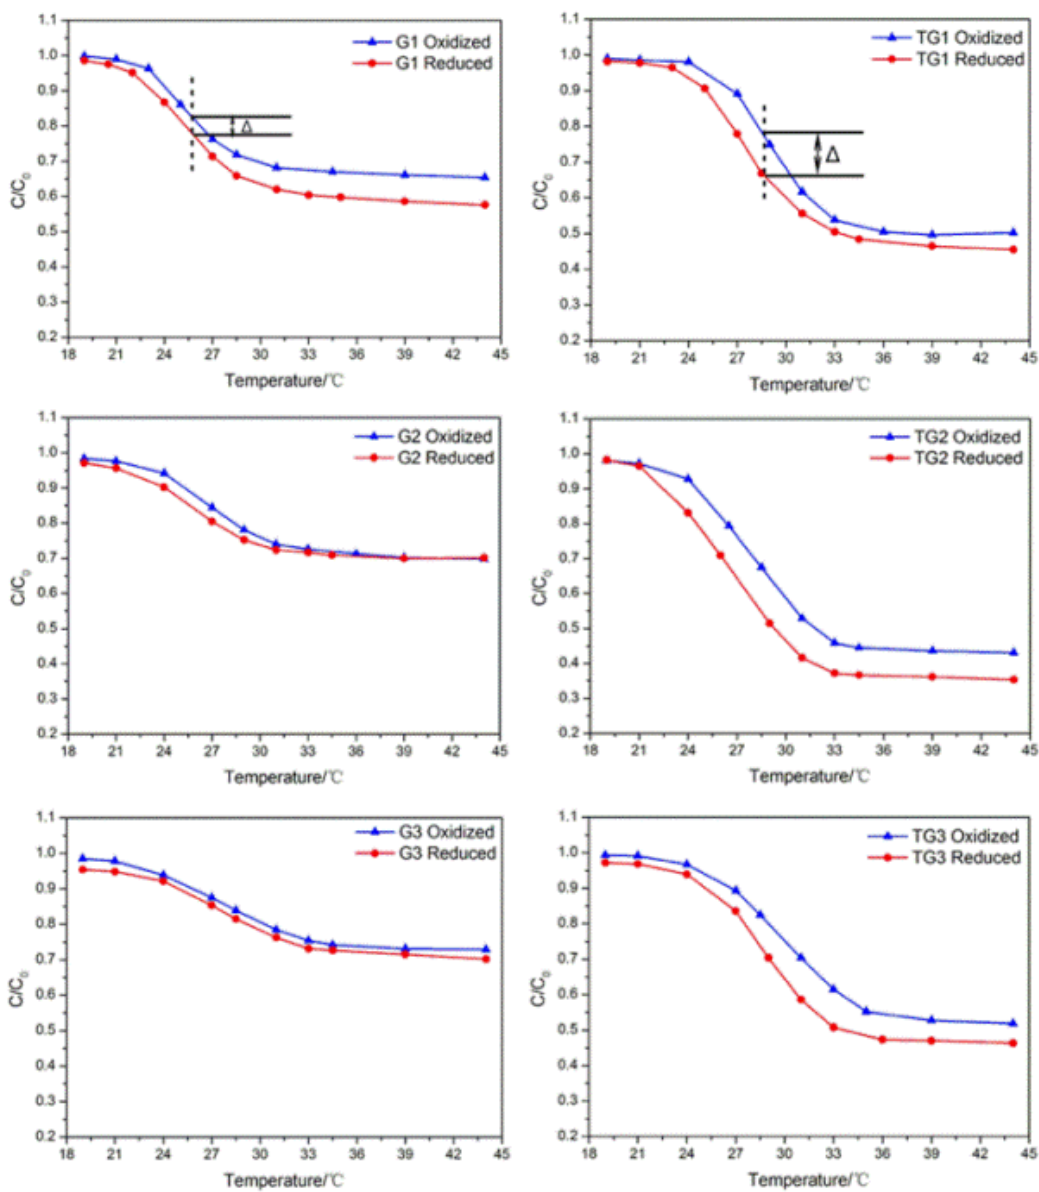

Fig. S11 Temperature-dependent circumference change of the AGs in both the oxidized states and the reduced states.  $C_0$  is the equilibrated circumference of the gels in a solutions of 5 mM  $Ce(SO_4)_2$  and 900 mM  $HNO_3$  (oxidized state) or 5 mM  $Ce_2(SO_4)_3$  and 900 mM  $HNO_3$  (reduced state) at 18 °C.  $C_i$  represents the equilibrated gel circumference at different temperatures.

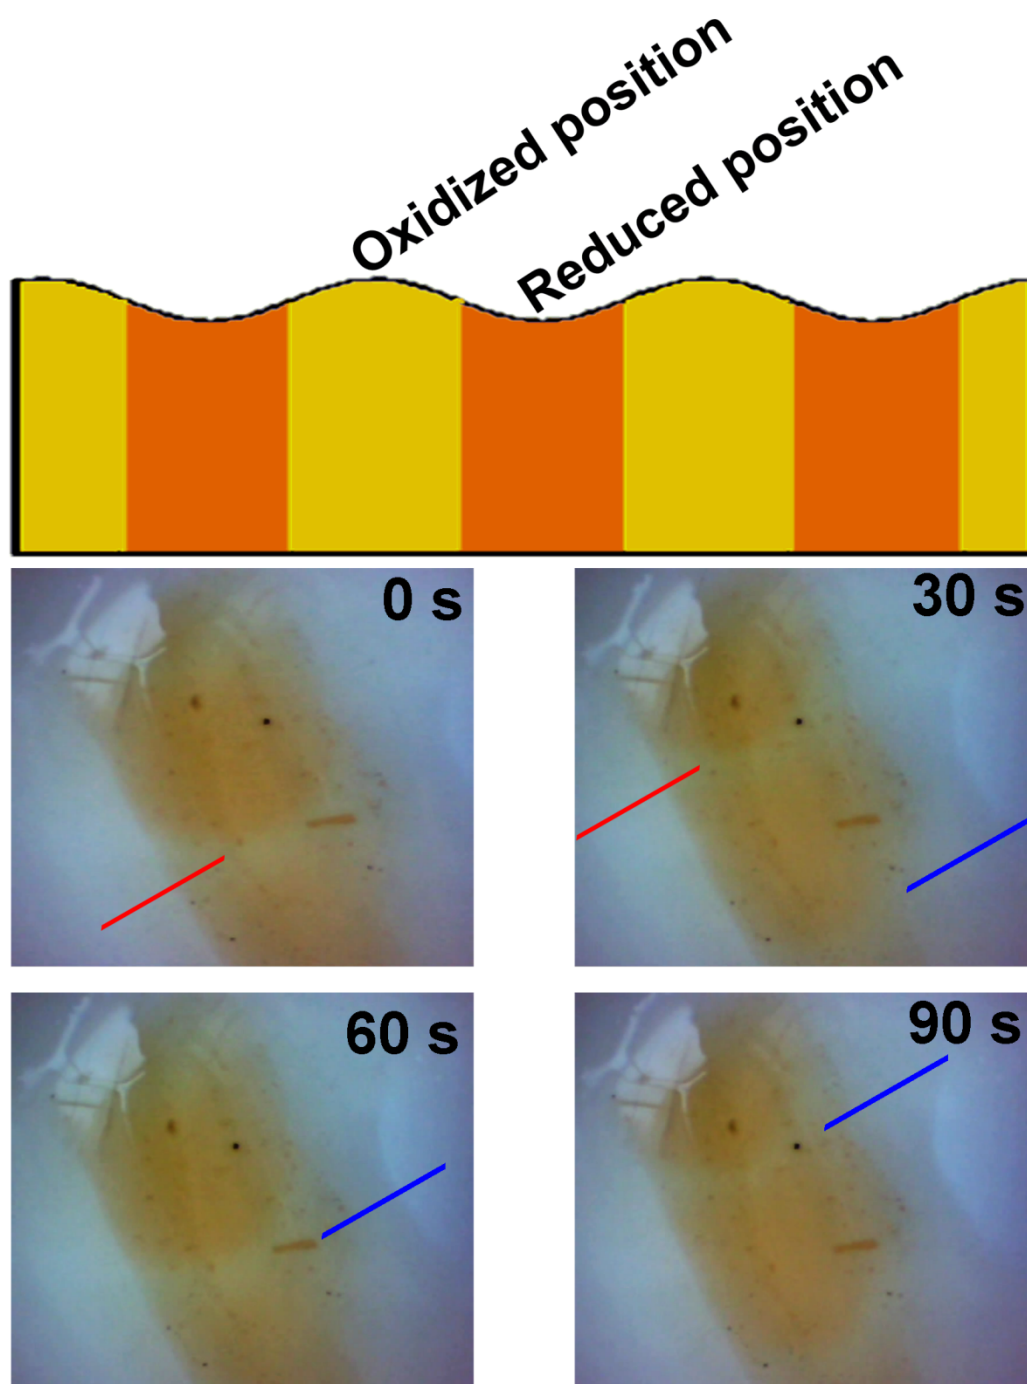

Fig. S12 Chemical wave and mechanical peristalsis in TG2.

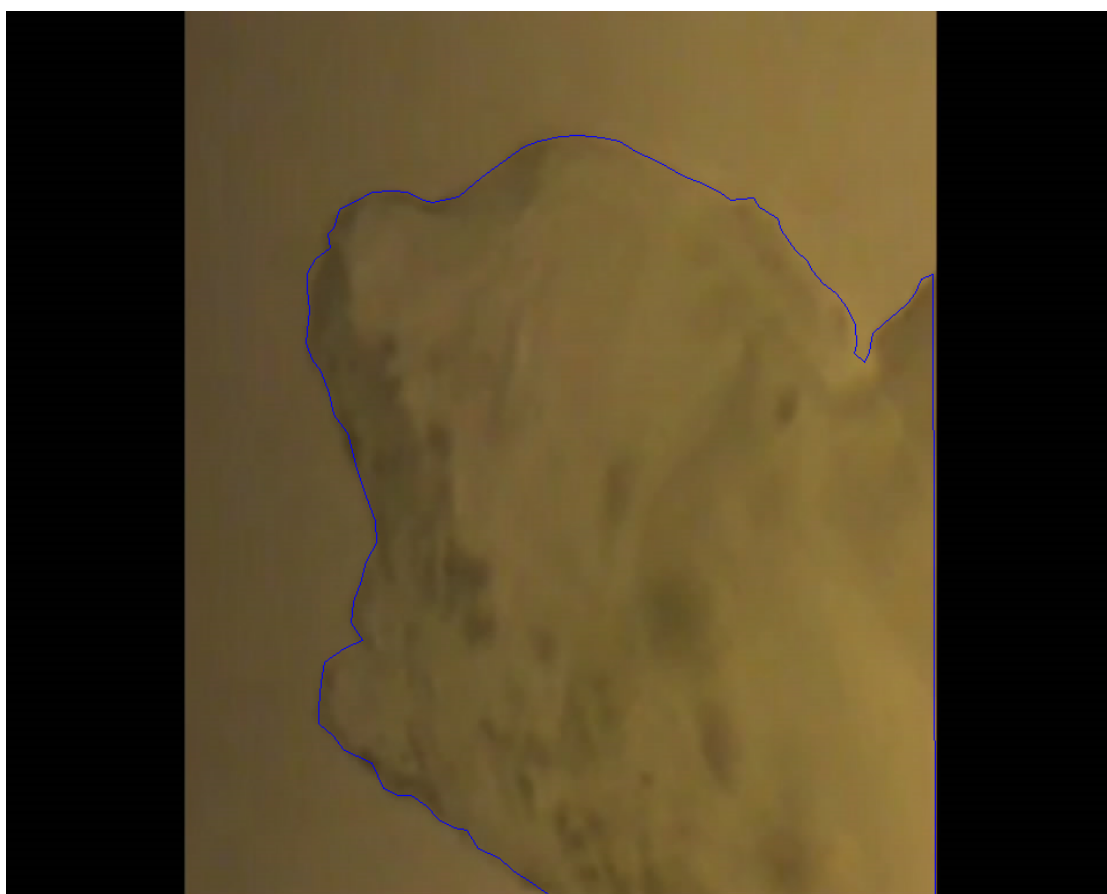

Fig. S13 The analysis of the mechanical oscillation for TG2.

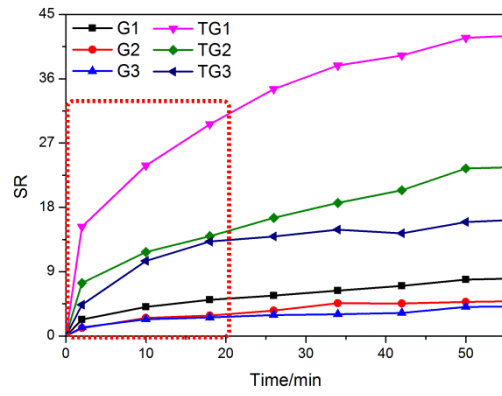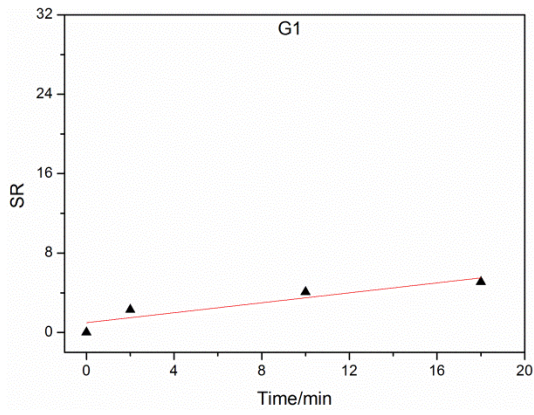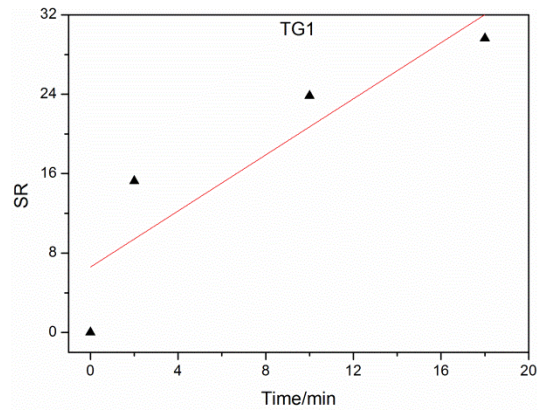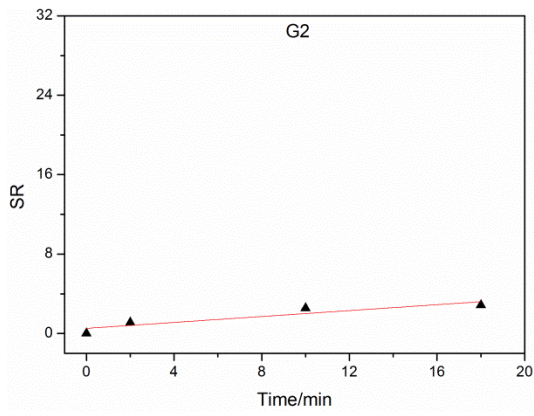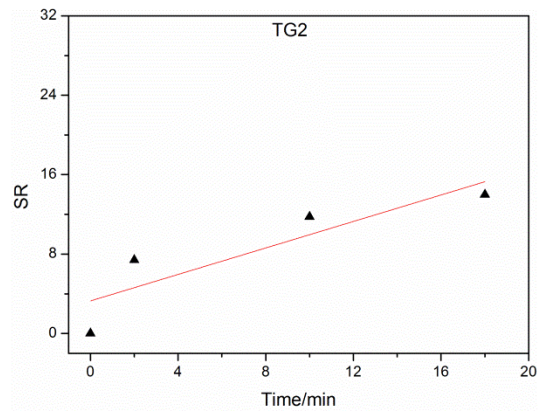



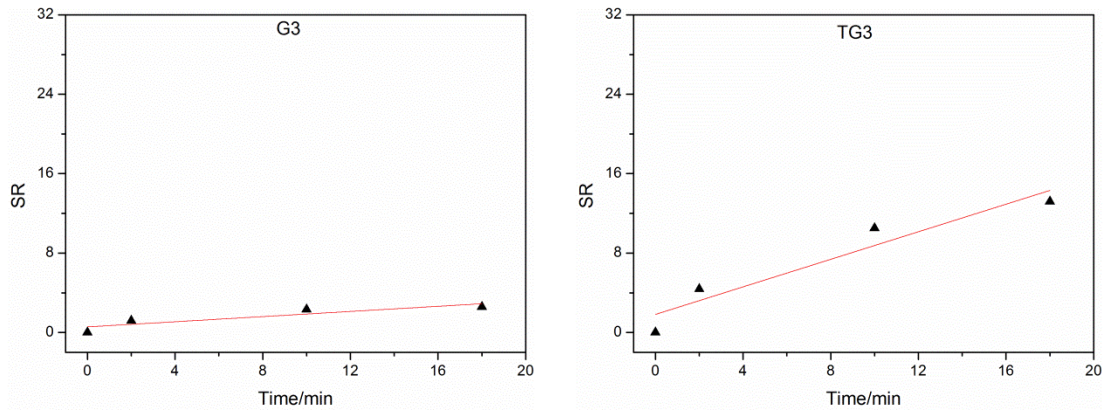

Fig. S14 Linear fitting curves of the marked position of Fig. 1c.

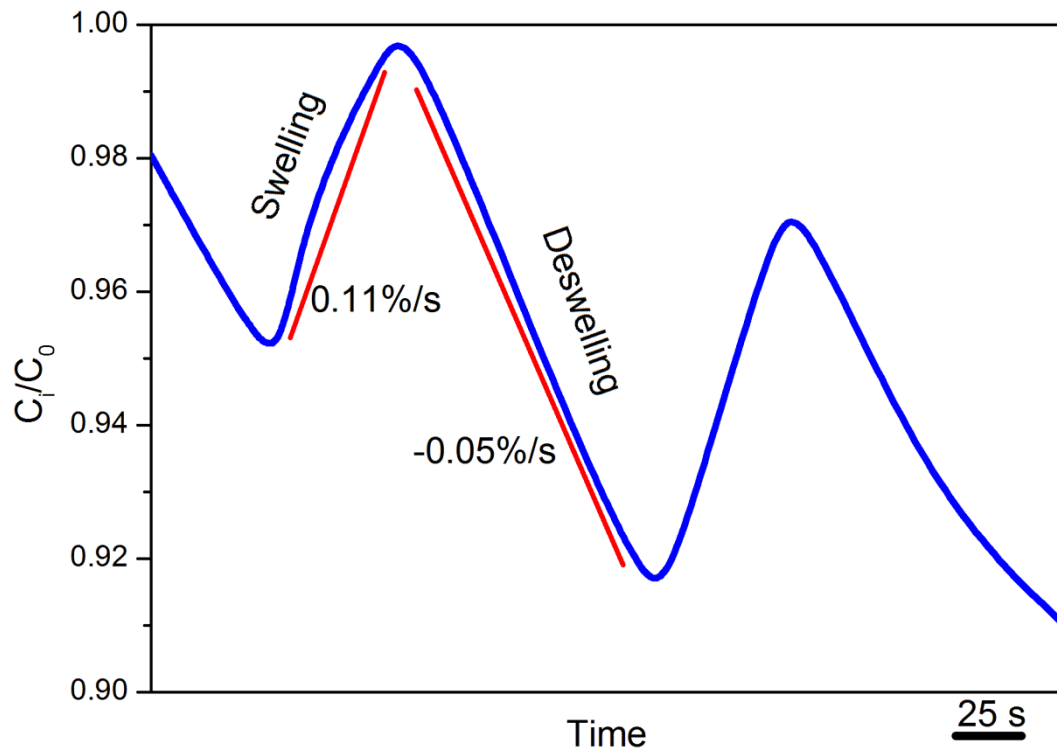

Fig. S15 The swelling and deswelling rates during the mechanical oscillation of TG2.

Table S2 Performances of the topological AGs

| Structure                            | Performances                                                                                                                                    | Ref.         |
|--------------------------------------|-------------------------------------------------------------------------------------------------------------------------------------------------|--------------|
| “Polyrotaxane-interlocked” Structure | The amplitude is more than 8% as calculated from the circumference variation.<br>The swelling/deswelling is on a scale of 20~40 $\mu\text{m}$ . | Present work |
| Microphase-separated structure       | Swelling-deswelling amplitude of more than 10% of the gel thickness.                                                                            | Ref5         |
|                                      | Gel cube is oscillating between 100 and 220 micrometers.                                                                                        | Ref6         |
| Hierarchical structure               | The swelling/deswelling is on a scale form 0.8~0.95 ( $L/L_0$ ).                                                                                | Ref7         |
| Comb-type BZ-gel                     | The BZ-gel oscillates between                                                                                                                   | Ref4         |

|  |                          |  |
|--|--------------------------|--|
|  | 390 and 420 micrometers. |  |
|--|--------------------------|--|

**Video TG-a and TG-b:** Chemical waves and peristalsis in TG2.

Speed up: 100 X.

$[\text{NaBrO}_3]=0.08 \text{ mol l}^{-1}$ ,  $[\text{Malonic acid}]=0.06 \text{ mol l}^{-1}$ ,  $[\text{HNO}_3] = 0.9 \text{ mol l}^{-1}$ ,  $T=20 \text{ }^\circ\text{C}$ .

**Video TG-c:** Mechanical oscillation of TG2.

Speed up: 100 X.

$[\text{NaBrO}_3]=0.08 \text{ mol l}^{-1}$ ,  $[\text{Malonic acid}]=0.06 \text{ mol l}^{-1}$ ,  $[\text{HNO}_3] = 0.9 \text{ mol l}^{-1}$ ,  $T=20 \text{ }^\circ\text{C}$ .

**Video TG-d:** Mechanical oscillation of TG2.

Speed up: 100 X.

$[\text{NaBrO}_3]=0.08 \text{ mol l}^{-1}$ ,  $[\text{Malonic acid}]=0.06 \text{ mol l}^{-1}$ ,  $[\text{HNO}_3] = 0.9 \text{ mol l}^{-1}$ ,  $T=22 \text{ }^\circ\text{C}$ .

**Video G-a:** Chemical waves in G2.

Speed up: 100 X.

$[\text{NaBrO}_3]=0.08 \text{ mol l}^{-1}$ ,  $[\text{Malonic acid}]=0.06 \text{ mol l}^{-1}$ ,  $[\text{HNO}_3] = 0.9 \text{ mol l}^{-1}$ ,  $T=19 \text{ }^\circ\text{C}$ .

**Video G-b:** Mechanical oscillation of G2.

Speed up: 100 X.

$[\text{NaBrO}_3]=0.08 \text{ mol l}^{-1}$ ,  $[\text{Malonic acid}]=0.06 \text{ mol l}^{-1}$ ,  $[\text{HNO}_3] = 0.9 \text{ mol l}^{-1}$ ,  $T=19 \text{ }^\circ\text{C}$ .

## References

- 1 (a) H. W. Zhou; E. X. Liang; Y. Pan, et al., *Rsc Adv* 2013, **3**,2182-2185; (b) H. W. Zhou; E. X. Liang; X. B. Ding, et al., *Chem. Commun.* 2012, **48**,10553-10555.
- 2 Y. T. Chan; S. N. Li; C. N. Moorefield, et al., *Chem-Eur J* 2010, **16**,4164-4168.
- 3 (a) T. J. Zhao; H. W. Beckham, *Macromolecules* 2003, **36**,9859-9865; (b) A. Bin Imran; T. Seki; K. Ito, et al., *Macromolecules* 2010, **43**,1975-1980; (c) A. Bin Imran; T. Seki; T. Kataoka, et al., *Chem. Commun.* 2008, 5227-5229.
- 4 R. Mitsunaga; K. Okeyoshi; R. Yoshida, *Chem. Commun.* 2013, **49**,4935-4937.
- 5 Y. Murase; S. Maeda; S. Hashimoto, et al., *Langmuir* 2009, **25**,483-489.
- 6 S. Maeda; Y. Hara; R. Yoshida, et al., *Angew. Chem. Int. Edit.* 2008, **47**,6690-6693.
- 7 D. Suzuki; T. Kobayashi; R. Yoshida, et al., *Soft Matter* 2012, **8**,11447-11449.
